# Supplementary material for: LncRNA GUSBP5-AS promotes EPC migration and angiogenesis and deep vein thrombosis resolution by regulating FGF2 and MMP2/9 through the miR-223-3p/FOXO1/Akt pathway
Source: publisher site journal article supplement (doi:10.18632/aging.102904), 2020-03-10
Supplement: Supplementary file [file aging-v12i5-102904-supplementary-material-SD1.pdf]

SUPPLEMENTARY FIGURE

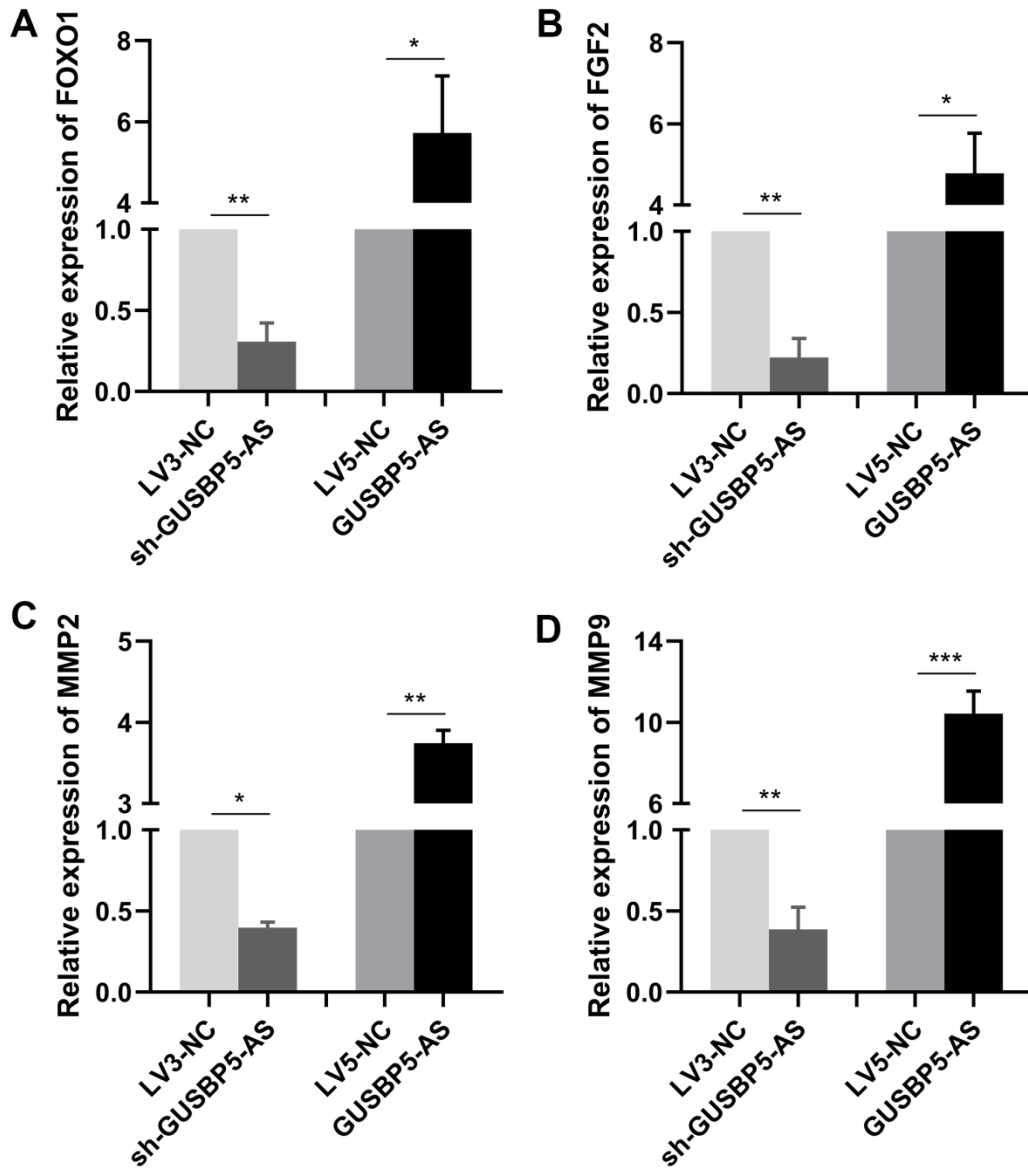

**Supplementary Figure 1. qRT-PCR analysis of the main angiogenesis and migration-related genes.** (A–D): Relative quantification of mRNA levels of FOXO1, FGF2, MMP2 and MMP9 were determined by qRT-PCR in EPCs infected with sh-GUSBP5-AS and GUSBP5-AS. \*P < .05, \*\*P < .01, \*\*\*P < .001 compared to the corresponding control group.
