# Supplementary material for: LncRNA GUSBP5-AS promotes EPC migration and angiogenesis and deep vein thrombosis resolution by regulating FGF2 and MMP2/9 through the miR-223-3p/FOXO1/Akt pathway
Source: publisher site journal article supplement (doi:10.18632/aging.102904), 2020-03-10
Supplement: Supplementary file [file aging-v12i5-102904-supplementary-material-SD2.pdf]

## SUPPLEMENTARY TABLE

Supplementary Table 1. Primers used for qRT-PCR.

---

|                |                   |                         |
|----------------|-------------------|-------------------------|
| Has-GUSBP5-AS  | Forward (5'---3') | CTGGTCCATCAACTGACAGCA   |
|                | Reverse (5'---3') | CAGAGCAGGGTTCATACATCC   |
| Has-FOXO1      | Forward (5'---3') | TCGTCATAATCTGTCCCTACACA |
|                | Reverse (5'---3') | CGGCTTCGGCTCTTAGCAAA    |
| Has-MMP9       | Forward (5'---3') | TGTACCGCTATGGTTACTCTCG  |
|                | Reverse (5'---3') | GGCAGGGACAGTTGCTTCT     |
| Has-MMP2       | Forward (5'---3') | TGACTTTCTTGGATCGGGTCG   |
|                | Reverse (5'---3') | AAGCACCACATCAGATGACTG   |
| FGF2           | Forward (5'---3') | AGAAGAGCGACCCTCACATCA   |
|                | Reverse (5'---3') | CGGTTAGCACACACTCCTTTG   |
| Has-miR-223-3p | Forward (5'---3') | GTTGCTCCTGTCAGTTTGTCAAA |
|                | Reverse (5'---3') | TATGGTTGTTACGACTCCTTCAC |
| Has-GAPDH      | Forward (5'---3') | CATGAGAAGTATGACAACAGCCT |
|                | Reverse (5'---3') | AGTCCTTCCACGATACCAAAGT  |
| Has-U6         | Forward (5'---3') | CTCGCTTCGGCAGCACA       |
|                | Reverse (5'---3') | AACGCTTCACGAATTTGCGT    |

---
